# Supplementary material for: A Novel Statistic for Genome-Wide Interaction Analysis
Source: PLoS Genet. 2010 Sep 23;6(9):e1001131. doi: 10.1371/journal.pgen.1001131 (PMC2944798; doi:10.1371/journal.pgen.1001131)
Supplement: Table S4 — P-value for testing interaction calculated by TIH, PLINK and logistic regression using genotype coding. (0.10 MB XLS) [file pgen.1001131.s004.xls]

## Sheet: Sheet1
Table S4. P-value for testing interaction calculated by TIH ，PLINK and logistic regression using genotype coding
						Dataset 1					Dataset 2
								Logistic Regression					Logistic Regression
SNP 1 (rs)	Gene 1	Chromsome1	SNP 2 (rs)	Gene 2	Chromsome2	TIH	PLINK	Recessive	Additive	Dominant	TIH	PLINK	Recessive	Additive	Dominant
626072	LAMA1	18	6121989	LAMA5	20	1.11022e-15	1.633e-07	0.0260626	7.81601e-08	3.14171e-06	5.67352e-07	0.001854	0.0364988	0.00140109	0.110391
626072	LAMA1	18	4925386	LAMA5	20	1.47438e-13	1.007e-06	0.0763897	5.81785e-07	1.05181e-05	9.8058e-07	0.002709	0.0506541	0.00187905	0.127026
1052248	LST1/NCR3	6	3131636	MICB	6	5.55889e-13	2.857e-09	0.00860808	1.13673e-09	1.10517e-05	7.76475e-10	1.763e-05	0.447313	9.66761e-06	9.74897e-06
1052248	LST1/NCR3	6	3132468	MICB	6	8.41327e-13	4.281e-09	0.0116497	1.71696e-09	1.10287e-05	8.96013e-10	2.026e-05	0.474969	9.97167e-06	7.73144e-06
443198	NOTCH4	6	3131636	MICB	6	1.12693e-11	6.143e-08	0.329407	2.94825e-08	4.53201e-05	3.9838e-08	6.325e-05	0.0292742	3.6265e-05	0.000783176
443198	NOTCH4	6	3132468	MICB	6	1.19417e-10	2.807e-07	0.32093	1.52432e-07	0.000156515	6.54714e-08	6.324e-05	0.0281499	4.64711e-05	0.00139394
1799964	LTA/TNF	6	3131636	MICB	6	1.61777e-10	3.08e-07	0.0709488	1.5172e-07	0.0368031	1.36104e-09	7.257e-05	0.419191	3.25025e-05	2.58817e-06
1799964	LTA/TNF	6	3132468	MICB	6	2.94401e-10	7.256e-07	0.0957199	3.79763e-07	0.0379702	2.50556e-09	8.298e-05	0.451319	4.33283e-05	2.76248e-06
4766587	ACACB	12	4807055	NDUFA11	19	3.0659e-10	6.245e-05	0.000312688	4.84013e-05	0.450542	6.6119e-07	0.0008552	0.00326984	0.000773803	0.985253
2227956	HSPA1L	6	3135392	HLA-DRA	6	3.19934e-10	2.455e-06	0.000114062	1.48718e-06	0.02632	7.81872e-10	9.598e-06	7.28911e-05	5.16693e-06	0.213811
1060856	ALDH7A1	5	2711288	PRKCE	2	3.56583e-10	3.007e-05	1.92908e-07	1.71143e-05	0.88097	2.555e-07	0.0002916	0.749874	0.000209046	0.000226267
2012359	PARP4	13	10823333	HK1	10	5.64803e-10	3.84e-05	0.000125669	2.6957e-05	0.136606	7.195e-07	0.0001479	0.000206143	7.6835e-05	0.999999
9311951	MAGI1	3	11195879	NRG3	10	8.52847e-10	6.223e-05	0.00100225	3.28815e-05	0.00339853	8.25482e-07	0.001808	0.0380635	0.00108806	0.0171129
3768650	STAM2	2	11993811	FGF20	8	9.19973e-10	4.53e-06	8.70636e-05	2.51615e-06	0.118191	3.25477e-08	0.0001149	0.00124675	9.9056e-05	0.850437
785915	GCNT1	9	11713331	PRICKLE2	3	1.30188e-09	5.337e-05	0.501163	3.63754e-05	0.000336946	2.95082e-07	3.823e-05	7.1271e-05	4.26454e-05	0.0369651
785916	GCNT1	9	11713331	PRICKLE2	3	1.37046e-09	6.077e-05	0.507557	4.21401e-05	0.000431802	5.51051e-07	6.982e-05	0.00013062	8.08405e-05	0.0660629
1202674	RPS6KA2	6	6061796	CDH4	20	2.45855e-09	4.188e-05	0.378495	3.10565e-05	1.12301e-05	1.62912e-08	0.0005164	0.00648009	0.000317624	0.000753358
1048471	ST3GAL1	8	2830096	APP	21	2.94796e-09	2.434e-05	0.00045548	1.84298e-05	0.10005	9.62764e-07	0.001105	0.110832	0.00108805	0.00364601
1025951	GALNT13	2	17568302	FMO2	1	3.40025e-09	3.392e-05	0.00315827	2.36134e-05	0.226075	9.28823e-07	0.002402	0.00329765	0.00193542	0.0138995
6954	KIAA0467/HYI	1	4773873	ABCC4	13	3.6655e-09	3.304e-06	0.000124089	2.25362e-06	0.00311074	4.74313e-07	0.003416	0.542185	0.00159439	0.0136422
4889291	BCMO1	16	16967626	UBE2Q2	15	5.77742e-09	2.661e-05	0.0481846	1.69785e-05	0.0390585	1.35596e-07	8.657e-05	0.000658219	7.76102e-05	0.57535
10997420	CTNNA3	10	12910830	NEDD4	15	6.88889e-09	2.482e-05	0.0444588	1.96151e-05	0.000483915	7.64757e-09	2.315e-05	0.0267624	8.93426e-06	0.00128498
1060856	ALDH7A1	5	7600159	PRKCE	2	6.89591e-09	5.582e-05	0.000264143	3.41936e-05	0.609507	9.06922e-08	0.0001193	0.205322	6.54638e-05	0.000393269
6874435	SV2C	5	9444530	ORC3L	6	7.30235e-09	9.427e-05	0.0198233	6.47432e-05	0.0124817	8.36208e-07	0.0004669	0.0224	0.000429453	0.514727
915895	NOTCH4	6	3131636	MICB	6	7.41098e-09	1.163e-06	0.0668887	6.96602e-07	7.9625e-05	1.59572e-07	5.308e-05	0.00604307	4.10063e-05	0.000145262
1799964	LTA/TNF	6	2227956	HSPA1L	6	7.51671e-09	1.284e-05	2.83323e-07	7.1563e-06	0.0265042	2.98412e-08	0.0002109	0.0798029	8.51503e-05	0.186519
2227956	HSPA1L	6	3134929	NOTCH4	6	7.75918e-09	2.796e-05	4.61442e-07	1.54918e-05	0.0739108	2.35957e-11	4.94e-06	2.14776e-07	1.11387e-06	0.0102039
2662990	PLCB1	20	11072635	RYR3	15	8.5429e-09	0.0001165	0.000478974	9.18196e-05	0.015668	9.12045e-07	0.001381	0.00911764	0.000915064	0.0015296
3131636	MICB	6	3134929	NOTCH4	6	9.4523e-09	1.805e-05	0.174725	1.2042e-05	0.0150262	3.04303e-08	0.0002043	0.245506	0.000110201	0.170482
6557337	OPRM1	6	7530592	VAV3	1	1.10116e-08	0.0001455	0.00231336	0.00012638	0.0928639	7.45423e-08	0.0002309	0.013826	0.000248711	0.0795282
280374	CNTN1	12	6101321	CDH4	20	1.12659e-08	6.213e-05	0.0618654	4.47712e-05	2.7989e-05	4.60086e-07	0.003248	0.00111913	0.00209513	0.832302
1002316	PARVA	11	2767485	LEPR	1	1.17614e-08	6.165e-05	0.0247366	4.55929e-05	0.00142065	9.21165e-09	0.0003599	0.238488	0.000300536	0.00151253
1465011	CACNA2D3	3	10788481	GRID1	10	1.22628e-08	0.000317	0.00228066	0.000254192	0.09879	7.50113e-07	0.0001335	0.0216527	0.000105562	0.0376018
2814811	GMDS	6	4235652	PRLR	5	1.26073e-08	0.0001852	0.0426492	0.000129613	0.00572962	3.6409e-07	0.0009803	0.235642	0.000719596	0.00535021
6429746	RP11-265F14.2	1	17016313	INPP4B	4	1.26415e-08	0.0001216	0.000467114	7.16057e-05	0.228536	9.72905e-09	7.117e-05	0.0997195	4.6032e-05	0.176909
1387003	NLGN1	3	4148328	UGT1A10/UGT1A8/UGT1A7/UGT1A6/UGT1A5/UGT1A9/UGT1A4/UGT1A1/UGT1A3	2	1.36498e-08	5.023e-05	0.704059	3.70177e-05	0.00151862	2.46919e-07	0.0005268	0.0533509	0.000547284	0.000197814
1799964	LTA/TNF	6	3135392	HLA-DRA	6	1.45137e-08	0.000126	0.00191132	9.66534e-05	0.180729	1.45033e-07	0.0002009	0.318458	0.000139178	0.000161575
2285658	GDE1	16	17226654	PTPRR	12	1.82719e-08	0.0001326	0.00548875	0.000110406	0.0448529	8.77324e-08	0.000678	0.74537	0.000491474	3.72854e-05
929046	DSE	6	1646594	FECH	18	1.88338e-08	0.00013	0.00101663	9.92667e-05	0.0121571	4.22843e-07	0.0002361	7.33569e-05	0.000212416	0.319623
1528103	DGKI	7	2357924	EDNRA	4	1.92807e-08	3.872e-05	0.0188531	2.69853e-05	0.0291044	9.23831e-07	0.0007899	0.463913	0.00058467	0.00247598
1444690	GALNT13	2	17568302	FMO2	1	1.96047e-08	0.0001139	0.00374761	8.73388e-05	0.405866	8.65958e-08	0.001368	0.00233401	0.00100105	0.0186795
2331903	STX6	1	11712939	ROBO2	3	1.96529e-08	0.0002745	0.567992	0.000223687	0.000657608	1.49921e-08	0.0003471	0.00147086	0.000307236	0.0019771
7671095	GRID2	4	10839659	OR2D3	11	2.00354e-08	9.928e-05	0.712498	7.82493e-05	9.71305e-05	2.81806e-08	0.0001854	0.0481617	0.000144687	0.00704555
1958715	OR4L1	14	3844750	EFNA5	5	2.14801e-08	0.0001693	0.000718814	0.000131912	0.570908	1.25281e-07	0.00332	0.274606	0.00192609	0.13083
940389	STON1/STON1-GTF2A1L	2	10745676	PLXNC1	12	2.1993e-08	0.0001899	0.002189	0.000157126	0.0190415	7.019e-07	0.0007674	0.473821	0.000770612	0.0295797
2297763	MGST3	1	12783350	NRG3	10	2.33175e-08	0.0001746	0.000935105	0.000135729	0.0371761	1.80128e-07	0.0002338	2.84951e-05	0.000270024	0.566215
2074172	GDE1	16	17226654	PTPRR	12	2.59527e-08	0.0001588	0.00536509	0.000133387	0.0444337	9.73392e-08	0.0007355	0.748646	0.000536321	3.92765e-05
7200407	XYLT1	16	17063899	FHIT	3	2.63176e-08	5.625e-05	0.00170433	2.99943e-05	0.340189	5.7174e-08	0.004092	2.28977e-06	0.00193583	0.706472
1110350	ITGA1	5	11029840	BBOX1	11	2.6678e-08	0.0002343	0.00376449	0.000170127	0.0333922	5.59701e-07	0.0005235	0.171701	0.000365327	0.00190947
9892725	ALOX12B	17	12630971	MAGI1	3	2.6962e-08	7.38e-05	0.000483929	5.85243e-05	0.0531431	5.93381e-07	0.001341	0.0422189	0.00121229	0.225361
1323809	RAD23B	9	3807992	CAV1	7	2.72472e-08	2.204e-05	0.000156205	1.65544e-05	0.261985	3.31354e-08	0.0006672	0.0234613	0.000599063	0.0116397
13179	EIF1AX	X	7882019	DMD	X	2.78401e-08	#N/A	0.0263645	8.62286e-05	0.00017744	4.37376e-09	#N/A	0.00108253	0.000118799	0.0100254
36206	EPHB1	3	13015805	ERBB4	2	2.82779e-08	5.656e-05	0.731986	4.4314e-05	0.000263803	5.21644e-07	0.0002806	0.00302692	0.00018167	0.106194
4691842	GUCY1A3	4	12476492	NRXN1	2	2.84975e-08	4.955e-05	0.00917354	4.08772e-05	0.00302975	1.34013e-07	0.0005096	0.00257143	0.000316774	0.00916952
3807705	MAGI2	7	13288535	DAPK1	9	2.89649e-08	4.98e-05	0.000388222	3.63786e-05	0.999998	8.6523e-07	6.669e-05	0.120213	3.27457e-05	0.237168
2910261	GRIA1	5	6486205	PDE3B	11	3.22837e-08	9.086e-05	0.00659515	7.67875e-05	0.00150831	7.87259e-07	0.00072	0.00617514	0.000936858	0.028266
289405	PDE8A	15	9631724	GRID2	4	3.31866e-08	9.697e-05	0.674219	6.71792e-05	0.0243898	1.02675e-07	0.001669	0.0153939	0.00143755	0.128068
1004464	DNM1	9	7144816	NRXN3	14	3.52018e-08	0.0003074	0.00031308	0.00024934	0.175718	2.79077e-07	0.0004271	0.00858067	0.000375834	0.212433
1370479	MAPK4	18	17622092	LHPP	10	3.55757e-08	8.817e-05	0.0028371	7.34298e-05	0.0597523	1.05244e-08	2.338e-05	5.01697e-05	9.51113e-06	0.0265674
3129869	HLA-DRA	6	3177928	HLA-DRA	6	3.77049e-08	3.488e-05	4.64199e-05	2.41999e-05	0.0640582	5.65104e-14	1.863e-07	0.00132474	3.49177e-08	5.92711e-06
10005129	COX7B2	4	17017363	CTNNA2	2	3.82438e-08	0.0001191	0.0130785	9.42596e-05	0.270346	3.0687e-07	0.0009102	0.00910401	0.000657219	0.0581138
2715817	MAP2K6	17	12327784	SYMPK	19	3.93843e-08	7.337e-05	0.561768	4.19687e-05	0.00122496	5.35609e-07	0.0003598	1	0.000243718	0.000843442
4840427	TNKS	8	10791997	CPT1A	11	4.09953e-08	0.0001872	0.239382	0.000146371	0.00947915	4.39856e-07	0.0002573	0.000237589	0.000228861	0.0196614
895033	SDC2	8	10878092	SRGAP1	12	4.34806e-08	1.811e-05	4.34575e-05	1.35289e-05	0.163485	2.47042e-07	0.0005905	0.00233628	0.00035503	0.00114619
1958716	OR4L1	14	3844750	EFNA5	5	4.48025e-08	0.0002136	0.000895528	0.000170135	0.560127	1.22291e-07	0.003277	0.270174	0.00189891	0.131079
149741	XYLB	3	10794440	ULK1	12	4.62427e-08	0.0001619	0.00147398	0.000132726	0.412918	7.24202e-07	0.0007753	0.00153564	0.000642172	0.104286
241436	TAP2	6	241453	TAP2	6	4.76999e-08	0.001214	0.00203568	0.00117237	0.00181523	4.441e-07	0.001675	0.018243	0.00152124	0.000593995
11705857	FGF12	3	13395090	ALLC	2	5.18387e-08	0.0002009	0.49929	0.000176313	0.000101684	7.17055e-07	0.0002438	0.0456114	0.000296541	0.0322388
2963954	GRIA1	5	6486205	PDE3B	11	5.25789e-08	0.0001489	0.0084359	0.000128212	0.00259937	2.24088e-07	0.000356	0.00251972	0.000460721	0.0313077
1416789	CHRM3	1	12634802	MAGI1	3	5.52785e-08	0.000245	0.113472	0.000204697	0.020293	4.95239e-07	0.001371	0.0422136	0.00130088	0.173622
10023511	MAML3/LOC100128457	4	13249338	LYN	8	5.8757e-08	7.517e-05	0.562036	3.5921e-05	2.70895e-05	8.69821e-07	0.0002259	0.00119419	0.000176787	0.999997
1799964	LTA/TNF	6	9268658	HLA-DRA	6	6.09571e-08	0.0003003	0.00816919	0.000268323	0.170324	4.27324e-07	0.0005809	0.171683	0.000389086	0.00241969
633742	TAF6L	11	7945490	EI24	11	6.41393e-08	4.233e-05	6.70337e-05	2.90577e-05	0.26532	7.96896e-07	0.0004557	0.0552247	0.000318283	0.00199211
4632970	AGK	7	9365363	PARK2	6	6.43222e-08	0.0001703	0.0179424	0.000143886	0.00767059	3.53663e-07	0.00143	0.115031	0.00153971	0.000356221
2322599	PTK2B	8	3791904	TNS1	2	6.99232e-08	0.0003645	0.000871669	0.000212507	0.136108	2.76195e-07	0.0002435	0.0010155	0.000165784	0.0638348
510006	ROBO1	3	7963015	C1S	12	7.2615e-08	0.0005332	0.00671397	0.000452675	0.00221802	6.15922e-07	0.0005806	0.000321906	0.000310094	0.0290281
10184862	STAM2	2	11993811	FGF20	8	7.46064e-08	7.559e-05	0.00068449	5.35376e-05	0.209417	9.40031e-08	0.0001525	0.0012564	0.000166564	0.768155
35258	PDE4D	5	2230793	IKBKAP	9	7.50259e-08	0.0003428	0.00468993	0.000269317	0.186076	7.84711e-07	0.0007155	0.778824	0.000499886	0.00086534
1422897	GRIA1	5	6486205	PDE3B	11	7.61628e-08	0.000167	0.00782918	0.000144648	0.00310379	1.30762e-07	0.000291	0.0032331	0.000373497	0.0273692
4589082	EPHB2	1	11243007	FARS2	6	7.91786e-08	0.0005851	0.00046887	0.000442945	0.504928	6.54364e-07	0.0007472	0.0256645	0.000518678	0.00714057
197641	DAB1	1	11789603	ABCA1	9	8.34296e-08	9.377e-05	0.0159064	4.61132e-05	0.0454678	1.54378e-07	2.621e-05	0.000146095	8.5668e-06	0.00354761
2254524	LSS	21	10860869	IGF1	12	8.57975e-08	0.0002683	0.0388758	0.000228606	0.0566769	6.34924e-09	8.327e-05	0.000851399	5.66332e-05	0.00683802
2395471	HLA-C	6	2853950	HLA-C	6	9.28744e-08	5.913e-05	0.0371538	4.63407e-05	0.0112208	8.68922e-08	0.0002242	0.406709	0.000160006	1.44245e-07
1472959	PSMD1	2	17362486	FHIT	3	9.36125e-08	0.0001804	0.00101316	0.000112733	0.117805	2.23368e-08	0.0001361	0.385546	6.64035e-05	0.003111
6703824	GJA5	1	7902180	HPSE2	10	9.77862e-08	0.0002103	0.00138691	0.000169389	0.251674	2.39092e-07	0.0002986	0.0575668	0.000354254	0.174419
3132468	MICB	6	3134929	NOTCH4	6	1.0181e-07	5.954e-05	0.207074	4.31277e-05	0.0326938	8.19447e-08	0.0002959	0.263948	0.000188489	0.16939
915895	NOTCH4	6	3132468	MICB	6	1.04334e-07	5.731e-06	0.0646077	3.80657e-06	0.000218848	1.23752e-07	4.414e-05	0.00565654	3.35723e-05	0.000153869
7677967	DCTD	4	9277341	HLA-DPA1	6	1.05736e-07	0.0003132	0.0254211	0.000247746	0.0929616	1.37346e-09	6.071e-06	0.173288	4.87646e-06	4.19082e-05
1108679	TLN2	15	3783786	PRKCH	14	1.08598e-07	0.0001395	0.00161483	8.40212e-05	0.139827	1.73303e-07	0.0002193	0.00420065	0.000161707	0.034821
4444007	HPSE2	10	6703824	GJA5	1	1.08745e-07	0.0001329	0.000880938	0.000105276	0.33398	6.86448e-07	0.00028	0.118962	0.000343019	0.0931646
196377	XYLB	3	6862429	SEMA5A	5	1.09818e-07	0.0001912	0.0804242	0.000161338	0.0026453	3.15484e-07	0.0004451	0.00704714	0.000375172	0.00083374
4934181	GRID1	10	9288014	PDE11A	2	1.12674e-07	0.0003043	0.0548538	0.000253377	0.055743	1.0933e-07	0.0001536	0.00991915	9.59804e-05	0.0217872
2373350	CNTNAP2	7	10494061	NTNG1	1	1.13074e-07	0.000233	0.00235058	0.000199314	0.00504218	1.66741e-08	4.907e-05	0.000533189	3.48406e-05	0.020421
471172	PPP2R2B	5	9870018	GRM7	3	1.14299e-07	0.0004363	0.00148433	0.000375694	0.155703	2.80244e-09	1.492e-05	0.187509	1.07832e-05	1.95986e-05
7872660	APBA1	9	10103255	NRG1	8	1.20059e-07	0.0001826	0.0696354	0.000134297	0.0545352	5.25533e-07	0.0003983	0.00931833	0.000290755	0.127746
10837771	OR51B4	11	16973321	RYR3	15	1.20479e-07	0.0003649	0.0566294	0.000308431	0.0200972	2.27579e-07	0.0002615	0.0148646	0.000170594	0.113836
1060856	ALDH7A1	5	6544868	PRKCE	2	1.24211e-07	0.0001275	0.000884571	8.46891e-05	0.862338	1.57761e-08	5.096e-05	0.20353	2.7971e-05	0.000268725
6740448	LTBP1	2	13215921	PARK2	6	1.25901e-07	0.0002641	0.0777954	0.000234036	0.00123634	8.25637e-08	0.0001367	0.00173007	8.77194e-05	0.0329702
6703824	GJA5	1	7091295	HPSE2	10	1.27247e-07	0.0002711	0.00261429	0.000223387	0.251314	3.62131e-07	0.0002318	0.0156474	0.000255897	0.154024
157871	RXRG	1	11803630	RYR2	1	1.27446e-07	0.001145	0.0384425	0.000944233	0.00073875	1.40323e-07	0.0009157	0.22076	0.000617057	0.000893786
6976382	SEMA3A	7	9532562	FOXO1	13	1.33241e-07	0.0004825	0.0797258	0.00039327	0.00501739	6.85156e-07	0.0009726	0.00728492	0.000756734	0.745517
2182418	PTPRC	1	7165654	LIPC	15	1.4492e-07	0.0004387	0.00721247	0.000382214	0.440655	4.92404e-07	0.00273	0.0554758	0.00203339	0.0945145
749049	ALDH18A1	10	4686612	FGF12	3	1.54751e-07	0.0001889	0.191532	0.000155466	0.00256699	3.8587e-07	0.001138	0.000658672	0.000685427	0.586099
2021729	OR2H1	6	12821657	NCOR2	12	1.58575e-07	0.001146	0.0107069	0.00104476	0.117711	7.62531e-07	0.0003984	0.120568	0.000390855	0.00104593
273994	CREB3L2	7	9366826	ITPR3	6	1.58918e-07	0.0004723	0.0731428	0.000409581	0.0158268	3.02576e-07	0.0001557	0.000332716	0.000132928	0.353082
1927978	DAPK1	9	2505556	CSGALNACT2	10	1.60855e-07	0.0006074	0.161083	0.000553386	0.0722346	3.62164e-07	0.000506	0.567951	0.000417482	2.79324e-05
2030737	EPHB1	3	10841575	PDE3A	12	1.726e-07	0.0004634	0.166234	0.000409646	0.12428	6.59994e-07	0.001562	0.000585193	0.00107689	0.0579975
4896202	PDE7B	6	6876003	PIK3R1	5	1.73073e-07	0.0001329	0.610301	0.000114571	1.44494e-05	1.30116e-07	0.0001889	0.0523149	0.000210439	0.00108089
6760827	GALNT13	2	10420254	PPP2R1A	19	1.7437e-07	0.0004446	0.019272	0.000398634	0.252613	3.34557e-08	0.0001302	0.00227693	0.000117775	0.0108496
4922073	CSGALNACT1	8	12502934	MAPK10	4	1.78342e-07	0.0001498	0.000461583	0.000130883	0.0523983	1.49942e-07	0.0002392	0.0094296	0.00019756	0.080625
10933170	COL4A3	2	17505589	IL7	8	1.78371e-07	0.0002703	0.00274707	0.000189837	0.0210607	1.30024e-07	0.0002984	0.0866735	0.00022203	0.0083845
231983	TNFSF10	3	11071933	SMAD3	15	1.80578e-07	0.0002274	0.0119566	0.000194724	0.00895087	2.34922e-07	0.0008056	0.0662114	0.00066294	0.00183774
197627	DAB1	1	11789603	ABCA1	9	1.81285e-07	0.0002227	9.16139e-05	0.000129184	0.738296	4.90061e-08	2.511e-05	3.14772e-05	8.0006e-06	0.0030976
2072619	MYH11	16	3822711	GALNT10	5	1.82597e-07	0.001434	0.0148488	0.000969191	0.003444	3.76955e-08	8.889e-05	0.107966	3.61467e-05	8.5581e-05
926687	HCK	20	17669257	FHIT	3	1.86153e-07	0.0004292	0.608207	0.000379932	0.00666739	5.04319e-07	0.0004065	0.0918251	0.000258667	0.00569292
1194507	PRKG1	10	1889941	HPSE2/LOC100133895	10	1.91799e-07	0.0005654	0.00273144	0.000451889	0.000497552	4.41748e-07	0.0002121	0.192141	0.000158372	0.000534629
11029795	BBOX1	11	41453047	SEMA3A	7	1.95638e-07	0.0002121	0.0164846	0.000172007	0.010513	4.78611e-07	0.0008474	0.00592994	0.000710498	0.412361
3177928	HLA-DRA	6	9269080	HLA-DRB4	6	1.95803e-07	0.0004645	6.59569e-05	0.000394214	0.441208	3.69621e-11	4.022e-05	0.0212391	2.6247e-05	1.174e-05
2229850	LAMA2	6	11719594	SEMA5B	3	2.07965e-07	0.0001238	7.99891e-05	7.98082e-05	0.0974222	2.56808e-07	0.001501	0.278244	0.000760265	0.00472531
3918347	DAO	12	11691292	RAPGEF4/LOC100134419	2	2.15585e-07	0.0001366	0.0169898	0.000110611	0.00329317	7.29311e-07	0.001127	0.498094	0.000905499	0.0427249
2664073	SRGAP3	3	9437663	DPYD	1	2.15844e-07	0.0003067	0.00332138	0.000250876	0.162968	8.20395e-07	0.001441	0.0184169	0.00116247	0.514399
444886	FAT	4	17031815	NCK2	2	2.21771e-07	0.0002101	0.0638797	0.000185418	0.0219392	9.57404e-08	0.0003393	0.0348017	0.00017676	0.00876708
644582	COL4A1	13	3736939	DOCK1	10	2.27587e-07	0.0006742	0.000125113	0.000523377	0.236822	2.64356e-07	0.0002118	0.000280467	0.000178755	0.00032484
1214748	DLK2/ABCC10	6	17017249	CTNNA2	2	2.28058e-07	0.0001858	0.0666171	0.000154829	0.00289335	7.93642e-07	0.0006886	0.0486809	0.000636898	0.00589716
2733168	HDAC11	3	7104753	RAG2/C11orf74/LOC100128837	11	2.31194e-07	0.0001626	0.813982	0.000115171	0.00388916	7.48579e-07	0.0007163	0.00186233	0.00063891	0.936465
2190305	CREB5	7	11765189	PTPRN2	7	2.31969e-07	0.000685	0.00370567	0.000557573	0.173456	4.93405e-07	0.001715	0.586412	0.00196625	1.23235e-05
7223172	NTN1	17	11633741	RYR3	15	2.32856e-07	0.0005627	0.000692989	0.000463972	0.010037	3.99802e-07	0.001061	0.0267218	0.0011176	0.00526644
6659914	EPHB2	1	11243007	FARS2	6	2.38374e-07	0.0009334	0.000480146	0.000758081	0.459446	9.6587e-09	0.0001597	0.00209602	0.000124562	0.00436413
4532668	GCNT1	9	11713331	PRICKLE2	3	2.45289e-07	0.0004666	0.659314	0.000399874	0.00128184	9.64056e-08	0.0001753	0.00198188	0.000171453	0.00565818
6857512	NPFFR2	4	10891628	ZBTB16	11	2.53776e-07	0.0007886	0.520038	0.000700144	0.0039342	3.55528e-07	9.926e-05	0.0122519	7.00924e-05	0.00960844
1462140	HPSE2/LOC100133895	10	7806058	CNTNAP2	7	2.57589e-07	0.0003727	0.117297	0.000273611	0.224325	4.08531e-07	0.000271	0.185155	0.000161982	0.0019054
2704289	HDAC9	7	4795744	ACCN1	17	2.57929e-07	0.0008076	0.100236	0.000669003	0.340391	8.3014e-07	0.001203	0.296478	0.000912594	0.00232017
1061535	HLA-A	6	8033940	LIPC	15	2.7099e-07	0.0004078	0.01464	0.000315239	0.0448806	6.58585e-07	0.0003348	0.0145855	0.000269249	0.212614
17622092	LHPP	10	17741814	MAPK4	18	2.72138e-07	0.000271	0.0731393	0.000235489	0.069671	5.60959e-08	0.0001018	3.41787e-05	6.2163e-05	0.0275192
7795083	WBSCR17	7	9403989	UST	6	2.75677e-07	0.0003751	0.00114478	0.000326419	0.0242084	9.61089e-07	0.0009358	0.00236841	0.000696857	0.228211
2285430	HDAC9	7	7812327	ASPH	8	2.77863e-07	0.0003283	0.0307597	0.000288357	0.00202262	6.26957e-07	0.0003853	0.0021705	0.000323784	0.0630152
609235	GRIA4	11	1242112	LGMN	14	2.81975e-07	0.0002874	0.110449	0.000251481	0.0090416	8.43168e-07	0.0009863	0.02176	0.00110672	0.0353897
1108679	TLN2	15	3783785	PRKCH	14	2.83568e-07	9.267e-05	0.0209787	6.42093e-05	0.00124915	4.63e-08	0.0003655	0.000385362	0.000273336	0.0355725
241436	TAP2	6	2856993	TAP2	6	2.83766e-07	0.0002174	0.00510505	0.000196022	0.00485809	1.06e-09	0.000165	0.0014236	0.000151782	7.82259e-05
7654531	NPFFR2	4	10891628	ZBTB16	11	2.92174e-07	0.000561	0.00178417	0.000492556	0.0496989	2.72519e-07	9.904e-05	0.00665641	7.03921e-05	0.00266126
10751593	LHPP	10	17741814	MAPK4	18	2.93363e-07	0.0002636	0.0327395	0.000227721	0.217088	4.02586e-07	0.0003692	0.00149847	0.000242326	0.0068082
3820578	DAB1	1	11948805	IQGAP2	5	2.95132e-07	0.0004704	0.00423716	0.000420808	0.00307092	6.65928e-07	0.0002109	0.0254143	0.000149862	0.00270032
10892622	GRIK4	11	12534066	CREB3L2	7	3.00612e-07	0.00101	0.00101825	0.000921051	0.0721752	2.25387e-09	2.774e-05	0.000171866	1.58553e-05	0.05888
2030737	EPHB1	3	4309199	PDE3A	12	3.04305e-07	0.000671	0.183859	0.000601685	0.137214	2.06534e-07	0.0008641	0.000660958	0.000588707	0.0288987
676925	CXCR5/BCL9L	11	999890	PIP5K3	2	3.072e-07	0.0004742	0.106971	0.000406562	0.09551	2.92966e-07	0.0006139	0.0277497	0.000503598	0.161148
4953292	PRKCE	2	12571587	ABLIM1	10	3.1164e-07	0.000374	0.029038	0.000336531	0.0086818	9.93361e-07	0.0004836	0.0275038	0.000434627	0.0158656
735883	TAP1	6	2856993	TAP2	6	3.19582e-07	0.0003701	0.062208	0.000303105	0.000272433	4.76897e-09	3.138e-05	0.00371186	3.29426e-05	0.00276041
7735139	ITGA1	5	11029840	BBOX1	11	3.3809e-07	0.000604	0.00864336	0.000477472	0.0306781	4.86904e-07	0.0004647	0.133961	0.000351325	0.00213462
4147822	ABCA4	1	6926600	ME1	6	3.5572e-07	0.0004537	3.02243e-05	0.000391781	0.774756	1.31089e-07	0.0001036	0.00580206	0.000122392	0.00986039
727047	PSCD4	22	7315608	GRIP1	12	3.63744e-07	0.0002431	0.00518517	0.000209543	0.133748	1.45806e-07	0.001201	0.00550382	0.00112721	0.116786
1534309	MCM7	7	2023079	PARK2	6	3.77858e-07	0.0004048	0.00513926	0.000351099	0.19422	3.02358e-07	0.00394	0.00780813	0.00270767	0.0184883
208611	HS3ST2	16	11706752	GRM7	3	3.82861e-07	0.0003615	0.0409729	0.000316975	0.0203017	8.52623e-07	0.000193	0.0204159	0.000322554	0.000157305
1946733	MAPK10	4	7632541	THRB	3	3.93008e-07	0.000809	0.140282	0.000703389	0.0780396	7.71871e-07	0.00102	0.357333	0.00115395	0.000423473
674733	LAMA1	18	1153590	RARB	3	3.94062e-07	0.0007873	0.00105637	0.000673402	0.00384669	1.06153e-07	0.0008774	0.268782	0.000859289	0.000102002
4314952	CTNNA3	10	11066856	UBE3B	12	4.14546e-07	0.0008574	0.156579	0.000727281	0.162535	5.38744e-07	0.0002934	0.000187946	0.000198459	0.0833232
10179053	CTNNA2	2	17469978	SHC4	15	4.15242e-07	0.0002404	0.0237665	0.000200921	0.0452617	7.50197e-08	9.14e-05	0.00729487	5.14283e-05	0.227103
254230	SEMA6A	5	8110666	CACNA1A	19	4.20274e-07	0.0006792	0.0198428	0.000602582	0.00489192	4.97287e-07	0.0004446	0.135955	0.000430002	0.0672857
566604	KCNB1	20	10950521	DGKB	7	4.23949e-07	0.003801	0.0222517	0.00330034	9.89182e-05	5.18065e-08	0.001356	0.0294087	0.00115642	0.00694102
1790001	PARK2	6	7128466	GRIK4	11	4.25875e-07	0.0006785	0.130602	0.000544644	0.000645508	3.57225e-09	0.000285	0.0438574	0.000141633	0.00183062
3780126	GGH	8	6766061	ITPR1	3	4.38043e-07	0.0009005	0.0131552	0.000722887	0.256956	1.6572e-07	0.0003918	0.00413191	0.000282354	0.187105
9999799	COX7B2	4	17017363	CTNNA2	2	4.45238e-07	0.0003754	0.0207241	0.000317713	0.271777	2.68808e-08	0.0002175	0.00564189	0.00013894	0.0614696
1543680	HIST1H4C	6	7039992	GNA14	9	4.48888e-07	0.0003411	0.0110624	0.000261275	0.637356	5.31432e-07	0.0005326	0.0227116	0.000175602	0.00541747
3770378	CTNNA2	2	11033105	SLC1A2	11	4.54511e-07	0.0006125	0.327212	0.000551177	0.00205024	7.32099e-08	0.0003449	0.00814229	0.000228323	0.00284277
727047	PSCD4	22	4453317	GRIP1	12	4.54756e-07	0.0002551	0.00421196	0.000220366	0.13354	2.19714e-07	0.001343	0.00449275	0.00126728	0.144733
4907008	LPAR3	1	11244894	ADAM12	10	4.60221e-07	0.0009012	0.00717578	0.000822762	0.0184169	7.96397e-07	0.001394	0.19071	0.00135111	0.00187819
708626	MYT1	20	16832154	CHRM3	1	4.74851e-07	0.0004601	0.000236843	0.000213918	0.13274	1.08899e-07	0.0001156	1.76435e-05	4.05121e-05	0.262181
6498132	CIITA	16	12051530	XYLT1	16	4.99625e-07	0.0005864	0.0710907	0.000485051	0.00785247	2.08859e-07	0.0002169	0.107542	8.38733e-05	0.0695995
849019	ITGB5	3	7897609	CTNNA3	10	5.05229e-07	0.0003818	0.195609	0.000344152	0.0377392	2.19322e-07	0.0003645	0.0831308	0.000309079	0.000142408
1126289	PRKCB1	16	1513643	IGF1R	15	5.11154e-07	0.001365	0.00613436	0.00122724	0.0103954	1.60716e-08	9.089e-05	0.219654	6.30835e-05	0.000548481
2910264	GRIA1	5	6486205	PDE3B	11	5.32706e-07	0.0003681	0.00274012	0.000326097	0.183459	3.22921e-08	7.14e-05	0.00345299	8.04117e-05	0.00674696
2545169	APC	5	9878228	PRICKLE2	3	5.35081e-07	0.0002712	0.00214702	0.000233688	0.331636	6.28667e-07	0.001337	0.00783302	0.00152273	0.0745084
10802795	CHRM3	1	12634802	MAGI1	3	5.37906e-07	0.0005793	0.11642	0.000505307	0.0252399	6.62374e-08	0.0002305	0.0436155	0.000203452	0.032076
163888	EFNA5	5	8035990	ITGA11	15	5.46982e-07	0.000422	0.000109683	0.000354955	0.79893	2.00643e-07	5.32e-05	0.00461743	2.09039e-05	0.137155
2527812	UBE2D4	7	7568534	DGKD	2	5.56554e-07	0.0005084	0.545128	0.000443809	0.000634623	3.79676e-08	0.000291	0.000512422	0.00025407	0.0484234
553822	GCLC	6	740417	CACNA1C	12	5.59729e-07	0.0008201	0.228336	0.000744252	0.0290894	1.32648e-08	0.0001435	0.268652	0.000163091	0.00294003
4253211	ERCC6/LOC100128032	10	10435892	GABBR2	9	5.5991e-07	0.0009062	0.00292119	0.000619138	0.490874	1.11253e-09	1.177e-05	0.0136346	4.00977e-06	0.0203753
2589183	SDC2	8	10878092	SRGAP1	12	5.62682e-07	0.0001513	0.000200062	0.000123854	0.169835	2.05654e-07	0.000738	0.00925186	0.000584449	0.000541601
2590685	PLXNA2	1	7660018	NUDT9	4	5.67625e-07	0.0005715	0.452317	0.000484519	0.000117603	1.17128e-07	0.0004885	0.000220368	0.000201203	0.734688
10194776	HTR2B/PSMD1	2	17362486	FHIT	3	5.75005e-07	0.0005321	0.00233121	0.000369096	0.115273	3.08441e-08	0.0001294	0.392458	6.28212e-05	0.00231319
4804833	MAP2K7	19	17396752	LTBP1	2	5.77173e-07	0.001874	0.00326177	0.00153516	0.231521	5.01528e-07	0.0003541	0.0101687	0.000288206	0.000995714
2288344	NEDD4	15	10997420	CTNNA3	10	5.81331e-07	0.0004936	0.120644	0.000438364	0.00442818	1.08657e-07	0.0001921	0.0172702	0.00011385	0.00314483
2053071	NFKBIB	19	7403483	GABRG3	15	5.8377e-07	0.0007835	0.0798039	0.000708553	0.0682559	1.16241e-07	0.0003153	0.0862375	0.000300868	0.000719052
4237270	PIP5K1B	9	4726499	TBXAS1	7	5.94974e-07	0.0007292	0.00441407	0.000652038	0.447891	2.51766e-07	0.0006187	0.00746592	0.000370323	0.00237373
7902879	ADAM12	10	10780690	NTRK2	9	6.06324e-07	0.0002862	0.0143469	0.000244316	0.114555	9.08741e-08	0.003338	0.011739	0.0017775	0.32413
1487371	HK2	2	2283551	CACNG3	16	6.16975e-07	0.0001971	0.371229	0.000156805	0.00117419	1.0955e-07	0.0006901	0.0011236	0.000318577	0.0994629
2038916	PRKG1	10	8007050	NRXN3	14	6.37591e-07	0.0002815	0.00358083	0.000214294	0.161748	3.5379e-07	0.0007848	0.00562698	0.000584858	0.0555788
6837516	ABLIM2	4	10925971	CHRM3	1	6.3937e-07	0.001737	0.00162223	0.00152657	0.0644962	2.60476e-07	0.0003843	0.218673	0.000247551	0.00295147
10980605	LPAR1	9	16878496	RASGRF2/LOC100129411	5	6.39446e-07	0.000541	0.0176703	0.000297477	0.0986545	9.28189e-07	0.001694	0.00453051	0.00145513	0.172206
1811700	DAB1	1	11789603	ABCA1	9	6.41016e-07	0.0004261	0.000268515	0.000270796	0.974239	6.07933e-08	2.868e-05	3.49414e-05	9.38957e-06	0.00308362
6874642	CSF1R/PDGFRB	5	7586969	ATIC	2	6.47949e-07	0.0001628	0.00335877	0.000131006	0.0573441	1.43743e-07	0.000237	0.00851626	0.000157743	0.111245
9314671	TJP2	9	10506974	ATP2B1	12	6.48843e-07	0.0005313	0.00502109	0.000405651	0.00227753	4.67439e-07	0.004464	0.0469972	0.00352364	0.157635
1627716	SRP54	14	6677965	UCK2	1	6.69139e-07	0.0007231	0.00837853	0.000630123	0.759872	7.5792e-08	0.00042	0.000430789	0.000228599	0.258049
1545133	POLR1B	2	8064077	MYH11	16	6.70818e-07	0.0008358	0.0184704	0.000764668	0.00181511	5.88418e-07	0.0007359	0.0261677	0.000635489	0.0389845
6555842	SLIT3	5	10761618	NCOA4	10	6.71797e-07	0.0006606	0.000546559	0.000579535	0.178542	1.78015e-07	0.0009482	0.0180135	0.00135925	0.185388
4773155	COL4A2	13	7710527	FER	5	6.74953e-07	0.0002725	0.000820974	0.000230634	0.99471	9.23983e-09	3.386e-05	0.000277821	2.32839e-05	0.0179102
38536	CACNA2D1	7	12468777	KCNIP3	2	6.85637e-07	0.003989	0.167762	0.0036782	0.0210607	6.6101e-07	0.001439	0.0922527	0.00145499	0.0243907
301802	RERE	1	4908881	ACOT7	1	6.95411e-07	0.0009432	0.216314	0.000725105	0.0361867	9.85586e-07	0.0008212	0.130505	0.000439317	0.0163188
3129882	HLA-DRA	6	3177928	HLA-DRA	6	6.95553e-07	8.129e-05	3.89682e-05	6.1824e-05	0.0392372	2.70894e-14	6.29e-08	0.0106281	1.40647e-08	4.32395e-05
1363345	CACNA1A	19	7013362	ATP6V1C1	8	6.97531e-07	0.0008052	0.116968	0.000748089	0.0225311	4.9148e-09	0.0001334	0.0028232	0.000159061	0.00302797
6967021	HDAC9	7	7574999	TCF7L1	2	6.97918e-07	0.001429	0.0104478	0.00133815	0.0106801	9.78599e-08	0.000203	0.0354037	9.86541e-05	0.000115944
10889897	PTGER3	1	17216768	ARHGEF3	3	7.15434e-07	0.0003813	0.182638	0.000326567	0.00357409	6.80133e-08	0.0005261	0.0319818	0.000398003	0.0223729
1533763	WNT11	11	11245288	LHPP	10	7.1694e-07	0.0004629	0.04615	0.000382721	0.353061	5.3561e-07	0.00018	0.000124135	0.00013557	0.288864
2394336	CTNNA3	10	10169102	PDE1A	2	7.41533e-07	0.000424	0.00210465	0.000370329	0.166786	9.0939e-07	0.001004	0.00524796	0.00063435	0.0162381
3796439	BMPR1B	4	10000775	CAMK2D	4	7.44538e-07	0.0007899	0.0194647	0.000725186	0.0199105	1.10715e-08	3.324e-05	0.0803115	3.27353e-05	0.00021567
327325	NRG1	8	3742290	UTP14C/ALG11	13	7.47081e-07	0.0004958	0.0249292	0.000370211	0.00741502	5.89805e-07	0.003371	0.127415	0.00140732	0.106555
995906	GRID2	4	3768651	STAM2	2	7.54679e-07	0.0005112	0.000731861	0.000442985	0.959006	6.12528e-08	0.0001916	0.00311691	8.12318e-05	0.0251924
715414	AMPH	7	10771281	ITPR2	12	7.56646e-07	0.0005876	0.00910555	0.000535139	0.10091	9.09155e-07	0.000305	0.00356338	0.00024208	0.0864889
4675	SERPIND1/PI4KA	22	7800935	CNTNAP2	7	7.61589e-07	0.0004142	0.0177584	0.000367713	0.0225915	9.19158e-07	0.001444	0.0396843	0.00218841	0.0214623
2240867	VAMP1	12	10061253	PDE4D	5	7.70208e-07	0.0009606	0.795104	0.000810996	0.00685922	9.2459e-07	0.0009638	0.0815496	0.000776313	0.0176425
510957	MTHFD1L	6	1076094	GRB2	17	7.71902e-07	0.001067	0.0657059	0.000927474	0.104565	3.07382e-07	0.0006898	0.0217792	0.000586455	0.0193832
8029247	NEDD4	15	10997420	CTNNA3	10	7.8277e-07	0.0006334	0.146976	0.000567786	0.00591303	6.34844e-08	0.0001426	0.016344	8.27851e-05	0.00176082
1041274	CDH4	20	1667744	THRB	3	7.85781e-07	0.0009907	0.00900072	0.000874353	0.39932	1.99126e-07	0.0005749	0.000358221	0.000325341	0.956424
9622429	CACNG2	22	16975424	COL4A1	13	7.87545e-07	0.0003275	0.0277581	0.000267566	0.00135999	9.67052e-07	0.0002833	0.332687	0.000339462	0.000374954
4467312	NRXN1	2	11669150	GP6	19	8.09228e-07	0.0007113	0.142603	0.000620353	0.00204103	1.57098e-09	2.938e-05	0.000178943	2.66157e-05	0.00172561
163274	ACSM1	16	2638315	GLS2	12	8.15928e-07	0.0005403	0.0177554	0.000468033	0.0262518	9.14281e-07	0.001152	0.00264586	0.000831831	0.969704
402256	ACCN1	17	10494134	CHIA	1	8.21989e-07	0.0009936	0.0019618	0.000874872	0.0227199	7.79451e-10	3.519e-05	0.000582315	2.67862e-05	0.162779
1411438	APBA1	9	2856177	COX10	17	8.45293e-07	0.0004445	0.0555168	0.000398489	0.00865924	6.41187e-07	0.000366	0.0135772	0.000358337	0.00110757
6740448	LTBP1	2	9458471	PARK2	6	8.55693e-07	0.0006638	0.0849064	0.000605182	0.00205327	8.16218e-08	0.0001263	0.00186114	8.10815e-05	0.0170694
911562	SLC1A2	11	3770378	CTNNA2	2	8.71424e-07	0.0007415	0.319932	0.00067112	0.00220751	2.42016e-08	0.0001956	0.131159	0.000124623	0.00378088
11077	POLR1C/XPO5	6	4611216	GRIK4	11	8.73189e-07	0.0008696	0.0536895	0.000778983	0.000258514	3.79686e-07	0.0005291	0.0660734	0.000413566	0.00406918
7706293	ITGA1	5	10823343	HK1	10	8.74286e-07	0.001413	0.0056114	0.00123428	0.00737434	8.33778e-07	0.001218	0.000972714	0.0012112	0.966944
1486933	ST6GALNAC3	1	4778800	ARNT2	15	8.76747e-07	0.003287	0.0144315	0.00296466	0.0628187	8.417e-07	0.0008933	0.00211938	0.000657253	0.153199
3134929	NOTCH4	6	3134931	NOTCH4	6	8.82125e-07	0.001565	0.0402272	0.00142906	0.534743	7.41143e-11	2.224e-05	0.85638	1.34911e-05	0.00254842
778817	GRIA1	5	11651414	MYH13	17	8.97681e-07	0.001012	0.00227928	0.0009222	0.100605	7.34478e-08	0.00028	0.0891174	0.000200927	0.017011
2069595	BDKRB2	14	8078890	MAP2K6	17	9.01301e-07	0.0003257	0.403961	0.000282229	0.00266471	7.5755e-07	0.003187	0.300595	0.00247361	0.0171142
2049799	FHIT	3	4761931	KRT71	12	9.06288e-07	0.0006132	0.0071847	0.000557678	0.00618315	7.4133e-08	0.000828	0.000335825	0.000651422	0.060632
4452195	GFPT1	2	9874600	CBLB	3	9.07757e-07	0.0004254	0.00367832	0.000362263	0.145606	2.51027e-08	0.0001532	0.0335603	0.000113535	0.0254591
11031781	WT1	11	12943037	GNA13	17	9.23114e-07	0.000625	0.00384022	0.000516312	0.797838	1.55052e-07	0.0001585	0.18099	9.33112e-05	0.0214344
9788916	CIITA	16	12051530	XYLT1	16	9.33881e-07	0.0006155	0.102899	0.000509471	0.00895447	1.79641e-07	0.000202	0.105027	7.70896e-05	0.0409018
1860093	CACNA1C	12	3799639	RPS6KA2	6	9.82408e-07	0.0004278	0.00583545	0.000361936	0.00965404	1.32696e-07	0.000258	0.0350089	0.00016642	0.0125741
361289	PDGFD	11	1407875	GRIN3A	9	9.90983e-07	0.0005734	0.032681	0.000519711	0.0197029	1.0039e-08	4.051e-05	0.000299599	6.49301e-05	0.0540943
4520787	NEDD4	15	7922094	CTNNA3	10	9.93794e-07	0.0004823	0.0303848	0.000429456	0.00643803	7.75765e-08	0.0001251	0.0277625	8.25511e-05	0.000500018
4295492	OPRM1/PIP3-E	6	6482989	DOCK1	10	9.97924e-07	0.001302	0.00717557	0.00120181	0.0284173	6.90336e-07	0.0003663	0.0643506	0.000574828	0.0334592
